# Supplementary material
Source: publisher site journal article supplement (https://www.dovepress.com/article/288589)
Supplement: Supplementary file 1 [file get_supplementary_file.php]

| <b>Supplement Table 1 Clinical characteristics of CML-CP patients</b> |                       |                        |          |
|-----------------------------------------------------------------------|-----------------------|------------------------|----------|
| <b>Characteristics</b>                                                | <b>RDW Low (n=81)</b> | <b>RDW High (n=56)</b> | <b>p</b> |
| Ages, median (range)                                                  | 44 (18~75)            | 41 (18~78)             | 0.928    |
| Gender female(n), (%)                                                 | 32 (39.5)             | 25 (44.64)             | 0.599    |
| WBC counts ( $\times 10^9/L$ ), median (range)                        | 91.27 (13.71~658.90)  | 217.86 (31.25~751.6)   | < 0.001  |
| Hemoglobin (g/L), median (range)                                      | 119.0 (68.0~156.0)    | 90.5 (53~165)          | < 0.001  |
| Platelet counts ( $\times 10^9/L$ ), median (range)                   | 456.0 (71.0~1932.0)   | 433.0 (109~1905.0)     | 0.851    |
| RBC counts ( $\times 10^{12}/L$ ), median (range)                     | 3.83 (1.97~5.02)      | 3.02 (1.09~5.09)       | < 0.001  |
| Admission RDW (%), median (range)                                     | 15.6 (13.3~16.7)      | 18.5 (16.8~22.9)       | < 0.001  |
| Eosinophil (%) (PB), median (range)                                   | 2 (0~10)              | 3 (0~15)               | 0.101    |
| Blast (%) (PB), median (range)                                        | 2 (0~10)              | 3 (0~3)                | 0.062    |
| Basophil (%) (PB), median (range)                                     | 4 (0~21)              | 3.5 (0~25)             | 0.793    |
| Splenomegaly (Yes), (n), (%)                                          | 56 (69.14)            | 48 (85.71)             | 0.027    |
| Smoke history (n), (%)                                                |                       |                        | 0.056    |
| Ever                                                                  | 29 (35.80)            | 11 (19.64)             |          |
| Never                                                                 | 52 (64.20)            | 45 (80.36)             |          |
| Initial treatment                                                     |                       |                        | 0.316    |
| Imatinib (n), (%)                                                     | 77 (95.06)            | 50 (89.29)             |          |
| Other TKIs (n), (%)                                                   | 4 (4.94)              | 6 (10.71)              |          |
| Cardiovascular system diseases (n), (%)                               | 22 (27.16)            | 11 (19.64)             | 0.417    |
| Sokal score                                                           |                       |                        | 0.039    |
| Low-risk                                                              | 64                    | 33                     |          |
| Intermediate-risk                                                     | 11                    | 14                     |          |
| High-risk                                                             | 6                     | 9                      |          |
| EUTOS score                                                           |                       |                        | 0.031    |
| Low- risk                                                             | 73                    | 42                     |          |
| High-risk                                                             | 8                     | 14                     |          |
| Hasford score                                                         |                       |                        | 0.545    |
| Low -risk                                                             | 53                    | 37                     |          |
| Intermediate-risk                                                     | 22                    | 12                     |          |
| High-risk                                                             | 6                     | 7                      |          |

Notes: PB, Peripheral blood; Cardiovascular system diseases: Chronic heart failure, Coronary atherosclerotic heart disease and Hypertension.
